# Supplementary material
Source: ML conference proceedings conference paper supplement (https://openreview.net/forum?id=D9jXj7nceM)
Supplement: supplementary_material [file Supplementary_Material.pdf › Supplementary_Material.pdf]

## Ablation Study on the Hyperparameter $n$

For NTKMTL-SR, the computational cost of calculating the NTK is minimal, allowing us to further investigate the impact of varying mini-batch sizes  $n$  on the results. Therefore, we set  $n$  to  $[1, 2, 3, 4, 6]$  and conduct an ablation study on the QM9 (11-task) benchmark. For each value of  $n$ , we conduct 3 repeated experiments with different random seeds and calculate the mean and variance for  $\Delta m\%$ . The results are shown in Fig. 2. When  $n = 1$ , the performance of NTKMTL-SR is comparable to that of NTKMTL. However, when increasing  $n$  from 1 to 2 or more, NTKMTL-SR shows a noticeable improvement in performance, accompanied by a reduction in the variance of performance across repeated experiments. We attribute this to the fact that increasing the number of mini-batches leads to a larger NTK matrix dimension, which in turn reduces stochastic error and allows our method to more accurately characterize the convergence speed of the tasks.

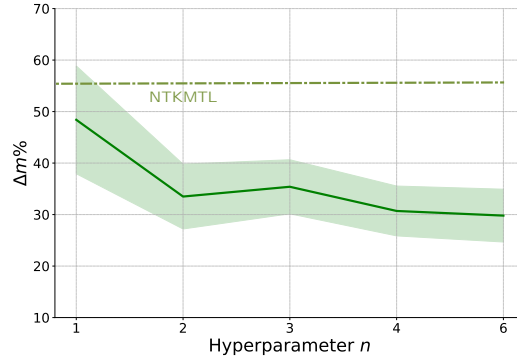

Figure 2: Ablation study on hyperparameter  $n$  on QM9. Each experiment is repeated over 3 random seeds, and the mean and stderr are reported.

However, we also find that the results for  $n = 4$  and  $n = 6$  are almost identical, and the performance differences observed were potentially weaker than the inherent variability stemming from different random seeds. Concurrently, Fig. 3 visualizes the training time per epoch for various  $n$  values on QM9. Despite only requiring the computation of the maximum eigenvalue of the NTK matrix with respect to  $z$ , training a single epoch when  $n = 6$  already approached 1.7 times the duration of the LS method. Overall, we posit that the selection of hyperparameter  $n$  is a trade-off between performance and training speed, and  $n = 4$  generally presents a favorable compromise.

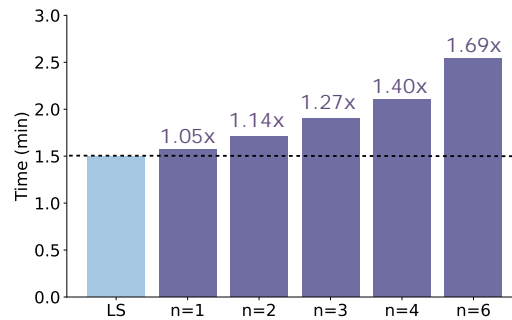

Figure 3: Training time per epoch for LS and NTKMTL-SR (with different hyperparameter  $n$ ) on QM9.
